# Supplementary material
Source: PubMed Central journal article supplement (PMC4107024)
Supplement: NIHMS594686-supplement-Supp_FigureS1-S3.pdf [file NIHMS594686-supplement-Supp_FigureS1-S3.pdf]

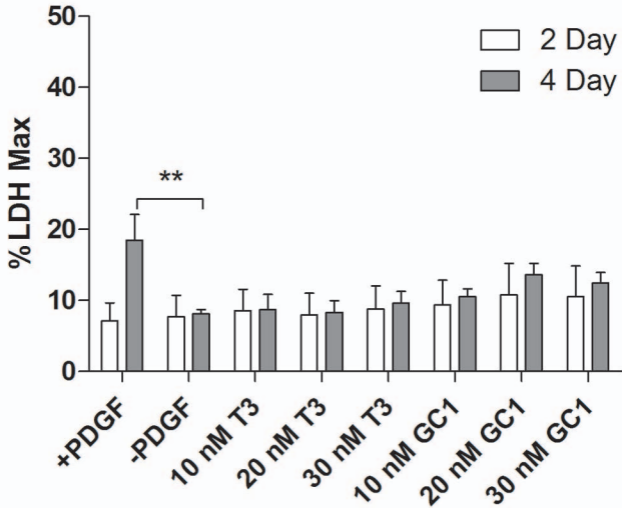

**A**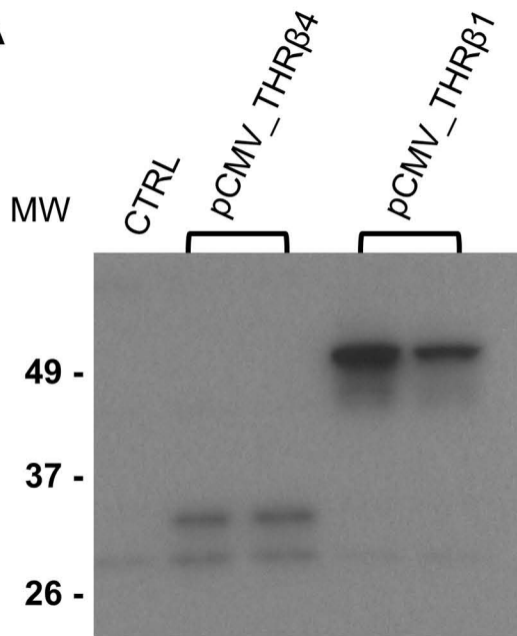**B**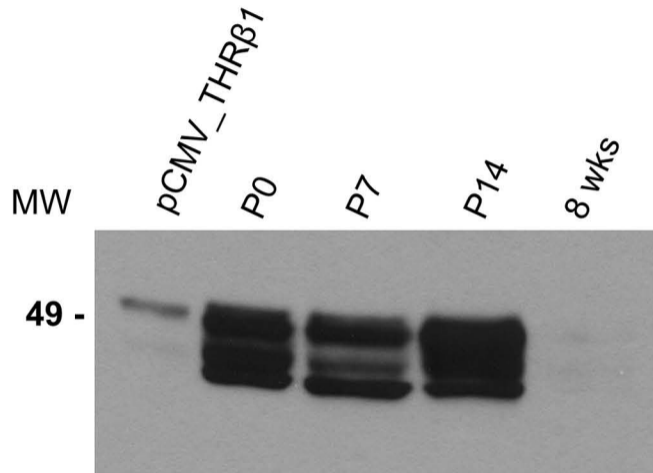

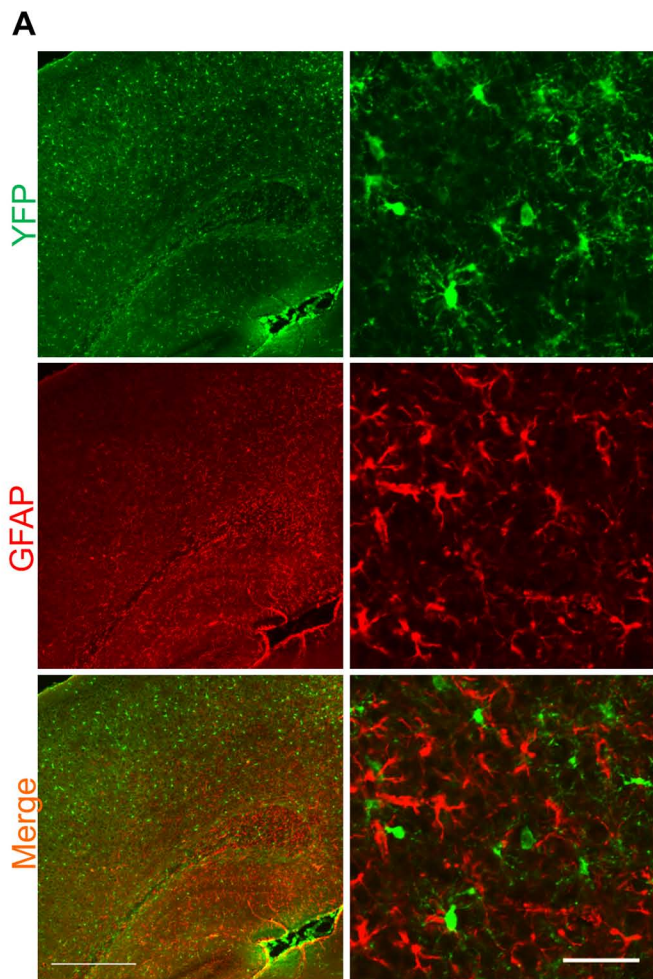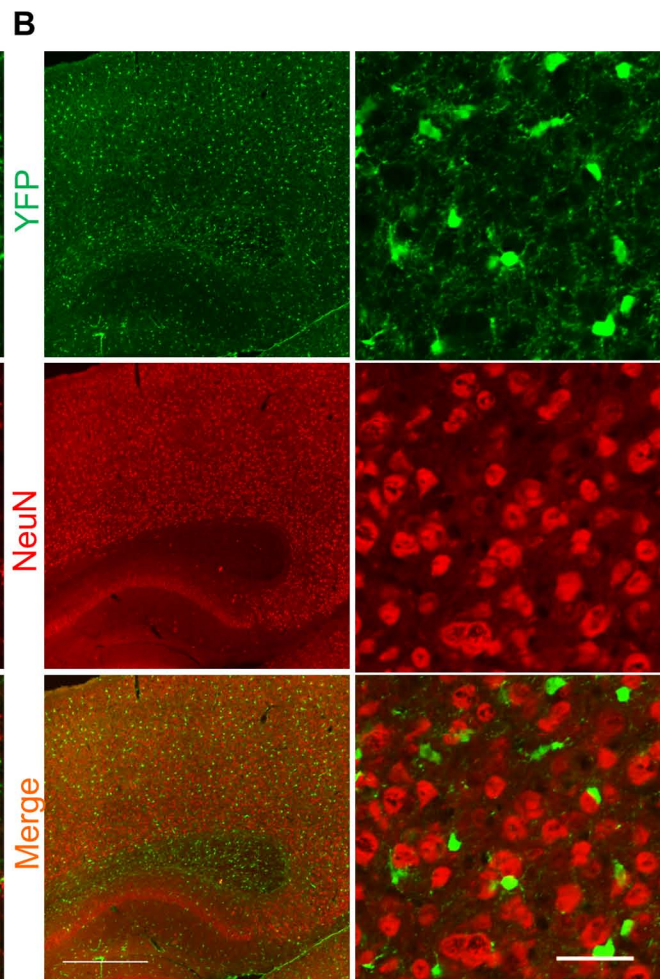

**C**

| Region           | Marker | Control    |              | GC-1       |              |
|------------------|--------|------------|--------------|------------|--------------|
|                  |        | Cell Count | % YFP+ Cells | Cell Count | % YFP+ Cells |
| Occipital Cortex | GFAP   | 0/615      | 0.0          | 0/733      | 0.0          |
| Corpus Callosum  | GFAP   | 0/560      | 0.0          | 0/633      | 0.0          |
| Occipital Cortex | NeuN   | 1/543      | 0.2          | 0/657      | 0.0          |
| Corpus Callosum  | NeuN   | 0/533      | 0.0          | 0/567      | 0.0          |
